# Supplementary material for: Impact of COVID-19 on patients awaiting ablation for atrial fibrillation
Source: PubMed Central journal article supplement — Open Heart. 2022 Jun 13;9(1):e001969. doi: 10.1136/openhrt-2022-001969 (PMC9195158; doi:10.1136/openhrt-2022-001969), 2022-06-13
Supplement: openhrt-2022-001969supp001.pdf [file openhrt-2022-001969supp001.pdf]

Atrial fibrillation (AF) can have a significant impact on quality of life and your answers will help us build up a clearer picture of how patients waiting for ablation are currently feeling. Your answers are confidential and all data is held securely. Individual answers will not be reported.

### Start Here:

1. What is your name and date of birth? \_\_\_\_\_

2. What is your sex?  Male  Female

3. Are you in AF all the time (persistent AF) or does it come and go (paroxysmal AF)

All the time  Comes and goes  Not sure / unable to answer

4. What medications are you currently taking for your heart rhythm problem?

- beta blockers e.g bisoprolol, nebivolol, atenolol, metoprolol
- calcium channel blockers e.g. verapamil, diltiazem (Tildiem. Adizem, Dilzem)
- Digoxin
- Amiodarone
- Flecainide or Propafenone
- Sotalol
- None

5. Which of the following health conditions apply to you?

- |                                                                                                                                           |                              |                             |
|-------------------------------------------------------------------------------------------------------------------------------------------|------------------------------|-----------------------------|
| Do you have diabetes?                                                                                                                     | <input type="checkbox"/> Yes | <input type="checkbox"/> No |
| Do you have heart failure?                                                                                                                | <input type="checkbox"/> Yes | <input type="checkbox"/> No |
| Have you ever had a stroke or mini stroke (TIA)?                                                                                          | <input type="checkbox"/> Yes | <input type="checkbox"/> No |
| Have you been diagnosed with high blood pressure?                                                                                         | <input type="checkbox"/> Yes | <input type="checkbox"/> No |
| Do you get cramps in your legs when you walk that go away when you stop /rest (peripheral vascular disease or peripheral artery disease)? | <input type="checkbox"/> Yes | <input type="checkbox"/> No |

6. Do you have any other health conditions which have a significant impact on your day-to-day quality of life? (Select ALL that apply)

- |                                                                      |                                                              |
|----------------------------------------------------------------------|--------------------------------------------------------------|
| <input type="checkbox"/> Angina                                      | <input type="checkbox"/> Kidney (renal) failure              |
| <input type="checkbox"/> Arthritis (that limits you)                 | <input type="checkbox"/> Liver failure                       |
| <input type="checkbox"/> Asthma/COPD                                 | <input type="checkbox"/> Mental health problems              |
| <input type="checkbox"/> Cancer                                      | <input type="checkbox"/> Obstructive sleep apnoea            |
| <input type="checkbox"/> Heart Attack                                | <input type="checkbox"/> Other lung problems that limit you  |
| <input type="checkbox"/> Hypertrophic Cardiomyopathy                 | <input type="checkbox"/> Other significant mobility problems |
| <input type="checkbox"/> Inflammatory bowel disease/ Crohn's disease | <input type="checkbox"/> Significant visual impairment       |
| <input type="checkbox"/> Weight problems that affect your health     | <input type="checkbox"/> Other                               |

**Other Please specify:****7. On average, how often do you manage to complete at least half an hour of moderately strenuous exercise (such as a brisk walk)?**

- Every day or more often
- 5-6 times per week
- 3-4 times per week
- 1-2 times per week
- Less than once per week
- Never

**8. Which anticoagulant medication do you take?**

- Dabigatran/Pradaxa
- Rivaroxaban/Xarelto
- Apixaban/Eliquis
- Edoxaban/Lixiana
- Warfarin
- None

**9. For what length of time have you suffered from AF (since you first had symptoms)?**

- |                                           |                                                |
|-------------------------------------------|------------------------------------------------|
| <input type="checkbox"/> Less than 1 year | <input type="checkbox"/> 6-7 years             |
| <input type="checkbox"/> 1-2 years        | <input type="checkbox"/> 7-8 years             |
| <input type="checkbox"/> 2-3 years        | <input type="checkbox"/> 8-9 years             |
| <input type="checkbox"/> 3-4 years        | <input type="checkbox"/> 9-10 years            |
| <input type="checkbox"/> 4-5 years        | <input type="checkbox"/> greater than 10 years |
| <input type="checkbox"/> 5-6 years        |                                                |

**10. Do you have a pacemaker or defibrillator/ICD fitted?**

- No
- Yes – but I don't know what kind of device
- Yes – a pacemaker
- Yes – a defibrillator / ICD

**11. How concerned are you about coronavirus delaying your ablation for atrial fibrillation?**

- not at all       - mildly       - a moderate extent       - very concerned



**Over the past four weeks**, as a result of your atrial fibrillation, how frequently were you bothered by:  
(Please circle one number which best describes your situation)

|                                                       | Not at all bothered or I did not have this symptom | Hardly bothered | A little bothered | Moderately bothered | Quite a bit bothered | Very bothered | Extremely bothered |
|-------------------------------------------------------|----------------------------------------------------|-----------------|-------------------|---------------------|----------------------|---------------|--------------------|
| 1. Palpitations: Heart fluttering, skipping or racing | 1                                                  | 2               | 3                 | 4                   | 5                    | 6             | 7                  |
| 2. Irregular heart beat                               | 1                                                  | 2               | 3                 | 4                   | 5                    | 6             | 7                  |
| 3. A pause in heart activity                          | 1                                                  | 2               | 3                 | 4                   | 5                    | 6             | 7                  |
| 4. Light-headedness or dizziness                      | 1                                                  | 2               | 3                 | 4                   | 5                    | 6             | 7                  |

**Over the past four weeks**, have you been limited by your atrial fibrillation in your:  
(Please circle one number which best describes your situation)

|                                                                         | Not at all limited | Hardly limited | A little limited | Moderately limited | Quite a bit limited | Very limited | Extremely limited |
|-------------------------------------------------------------------------|--------------------|----------------|------------------|--------------------|---------------------|--------------|-------------------|
| 5. Ability to have recreational pastimes, sports, and hobbies           | 1                  | 2              | 3                | 4                  | 5                   | 6            | 7                 |
| 6. Ability to have a relationship and do things with friends and family | 1                  | 2              | 3                | 4                  | 5                   | 6            | 7                 |

**Over the past four weeks**, as a result of your atrial fibrillation, how much difficulty have you had in:  
(Please circle one number which best describes your situation)

|                                                                                                                                                   | No difficulty at all | Hardly any difficulty | A little difficulty | Moderate difficulty | Quite a bit of difficulty | A lot of difficulty | Extreme difficulty |
|---------------------------------------------------------------------------------------------------------------------------------------------------|----------------------|-----------------------|---------------------|---------------------|---------------------------|---------------------|--------------------|
| 7. Doing any activity because you felt tired, fatigued, or low on energy                                                                          | 1                    | 2                     | 3                   | 4                   | 5                         | 6                   | 7                  |
| 8. Doing physical activity because of shortness of breath                                                                                         | 1                    | 2                     | 3                   | 4                   | 5                         | 6                   | 7                  |
| 9. Exercising                                                                                                                                     | 1                    | 2                     | 3                   | 4                   | 5                         | 6                   | 7                  |
| 10. Walking briskly                                                                                                                               | 1                    | 2                     | 3                   | 4                   | 5                         | 6                   | 7                  |
| 11. Walking briskly uphill or carrying groceries or other items, up a flight of stairs without stopping                                           | 1                    | 2                     | 3                   | 4                   | 5                         | 6                   | 7                  |
| 12. Doing vigorous activities such as lifting or moving heavy furniture, running, or participating in strenuous sports like tennis or racquetball | 1                    | 2                     | 3                   | 4                   | 5                         | 6                   | 7                  |

**Over the past four weeks** as a result of your atrial fibrillation, how much did the feelings below bother you?  
(Please circle one number which best describes your situation)

|                                                                                                  | Not at all bothered | Hardly bothered | A little bothered | Moderately bothered | Quite a bit bothered | Very bothered | Extremely bothered |
|--------------------------------------------------------------------------------------------------|---------------------|-----------------|-------------------|---------------------|----------------------|---------------|--------------------|
| 13. Feeling worried or anxious that your atrial fibrillation can start anytime                   | 1                   | 2               | 3                 | 4                   | 5                    | 6             | 7                  |
| 14. Feeling worried that atrial fibrillation may worsen other medical conditions in the long run | 1                   | 2               | 3                 | 4                   | 5                    | 6             | 7                  |

**Over the past four weeks**, as a result of your atrial fibrillation treatment, how much were you bothered by:  
(Please circle one number which best describes your situation)

|                                                                                                                                                  | Not at all bothered | Hardly bothered | A little bothered | Moderately bothered | Quite a bit bothered | Very bothered | Extremely bothered |
|--------------------------------------------------------------------------------------------------------------------------------------------------|---------------------|-----------------|-------------------|---------------------|----------------------|---------------|--------------------|
| 15. Worrying about the treatment side effects from medications                                                                                   | 1                   | 2               | 3                 | 4                   | 5                    | 6             | 7                  |
| 16. Worrying about complications or side effects from procedures like catheter ablation, surgery, or pacemaker therapy                           | 1                   | 2               | 3                 | 4                   | 5                    | 6             | 7                  |
| 17. Worrying about side effects of blood thinners including nosebleeds, bleeding gums when brushing teeth, heavy bleeding from cuts, or bruising | 1                   | 2               | 3                 | 4                   | 5                    | 6             | 7                  |
| 18. Worrying or feeling anxious that your treatment interferes with your daily activities                                                        | 1                   | 2               | 3                 | 4                   | 5                    | 6             | 7                  |

**Overall, how satisfied are you at the present time** with:  
(Please circle one number which best describes your situation)

|                                                                                  | Extremely satisfied | Very satisfied | Somewhat satisfied | Mixed with satisfied and dissatisfied | Somewhat dissatisfied | Very dissatisfied | Extremely dissatisfied |
|----------------------------------------------------------------------------------|---------------------|----------------|--------------------|---------------------------------------|-----------------------|-------------------|------------------------|
| 19. How well your current treatment controls your atrial fibrillation?           | 1                   | 2              | 3                  | 4                                     | 5                     | 6                 | 7                      |
| 20. Extent to which treatment has relieved your symptoms of atrial fibrillation? | 1                   | 2              | 3                  | 4                                     | 5                     | 6                 | 7                      |

We would like to know how good or bad your health is today.

The scale is numbered from 0 to 100.

100 means the best health you can imagine

0 means the worst health you can imagine

Mark an X on the scale to indicate how your health is TODAY

Your Health Today:

Now, please write the number you marked in the box here.

Under each heading, please tick the ONE box that best describes your health TODAY

#### MOBILITY

- I have no problems in walking about
- I have slight problems in walking about
- I have moderate problems in walking about
- I have severe problems in walking about
- I am unable to walk about

#### SELF-CARE

- I have no problems washing or dressing myself
- I have slight problems washing or dressing myself
- I have moderate problems washing or dressing myself
- I have severe problems washing or dressing myself
- I am unable to wash or dress myself

#### USUAL ACTIVITIES (e.g. work, study, housework, family or leisure activities)

- I have no problems doing my usual activities
- I have slight problems doing my usual activities
- I have moderate problems doing my usual activities
- I have severe problems doing my usual activities
- I am unable to do my usual activities

#### PAIN / DISCOMFORT

- I have no pain or discomfort
- I have slight pain or discomfort
- I have moderate pain or discomfort
- I have severe pain or discomfort
- I have extreme pain or discomfort

#### ANXIETY / DEPRESSION

- I am not anxious or depressed
- I am slightly anxious or depressed
- I am moderately anxious or depressed
- I am severely anxious or depressed
- I am extremely anxious or depressed

The best health  
you can imagine

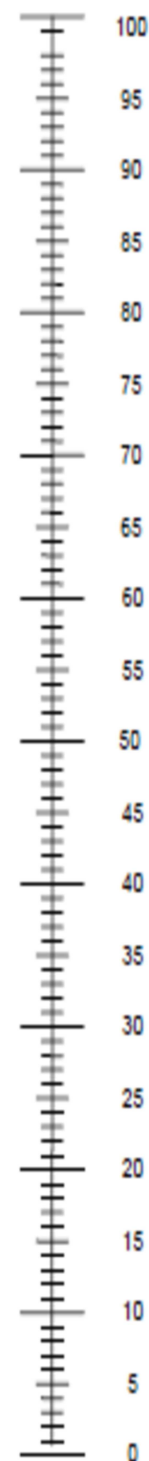

The worst health  
you can imagine
