# Supplementary material for: Impact of COVID-19 on patients awaiting ablation for atrial fibrillation
Source: PubMed Central journal article supplement — Open Heart. 2022 Jun 13;9(1):e001969. doi: 10.1136/openhrt-2022-001969 (PMC9195158; doi:10.1136/openhrt-2022-001969), 2022-06-13

There were 142 patients on the waiting list for atrial fibrillation (AF) ablation. We received 121 responses but excluded 3 patients as the quality of life (QoL) scores were incomplete. Of the 118 patients, priority categorization was available for 86 patients. There was a single patient categorized as C1 (urgent) with the remaining 85 patients in C2 (high priority) and C3 (routine) as demonstrated in the figure below.

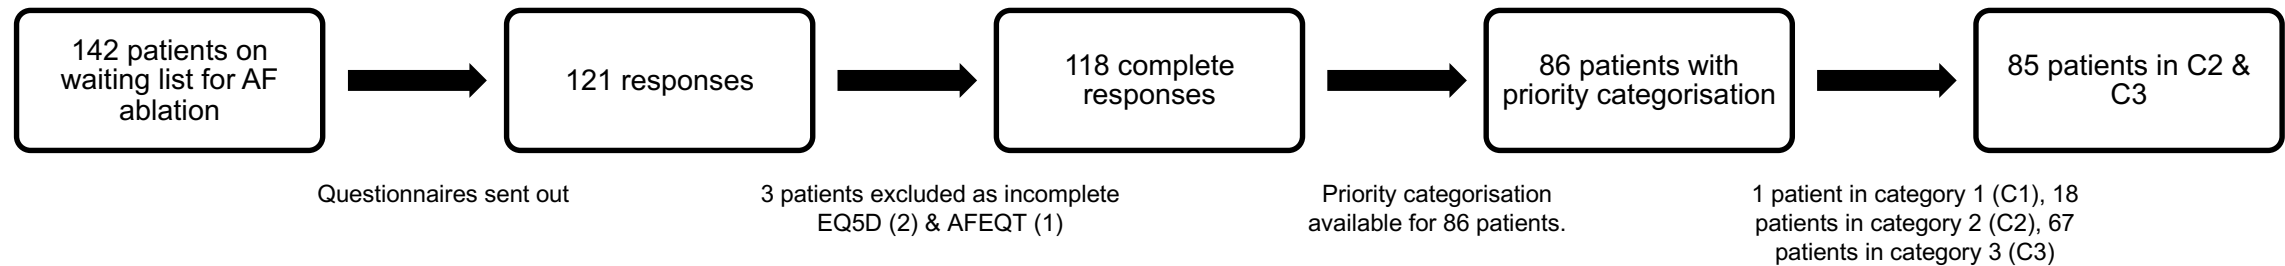

Supplement: openhrt-2022-001969supp002.pdf [file openhrt-2022-001969supp002.pdf]
