# Supplementary material for: Impact of COVID-19 on patients awaiting ablation for atrial fibrillation
Source: PubMed Central journal article supplement — Open Heart. 2022 Jun 13;9(1):e001969. doi: 10.1136/openhrt-2022-001969 (PMC9195158; doi:10.1136/openhrt-2022-001969), 2022-06-13
Supplement: openhrt-2022-001969supp003.pdf [file openhrt-2022-001969supp003.pdf]

| Prioritization category    | With (86 patients) | Without (32 patients) |
|----------------------------|--------------------|-----------------------|
| Age (years)                | 63 ± 1.1           | 65 ± 1.8              |
| Gender                     |                    |                       |
| • <i>Male</i>              | 65.9%              | 62.5%                 |
| • <i>Female</i>            | 34.1%              | 37.5%                 |
| AF symptom pattern         |                    |                       |
| • <i>Paroxysmal</i>        | 61.2%              | 75.0%                 |
| • <i>Persistent</i>        | 21.2%              | 18.8%                 |
| • <i>Unsure</i>            | 16.5%              | 6.3%                  |
| AF symptom duration        |                    |                       |
| • < 1 year                 | 8.2%               | 0.0%                  |
| • 1 -3 years               | 29.4%              | 15.6%                 |
| • 3 – 5 years              | 14.1%              | 25.0%                 |
| • > 5 years                | 47.1%              | 59.4%                 |
| No. of hospital admissions |                    |                       |
| • None                     | 32.9%              | 37.5%                 |
| • Once                     | 21.2%              | 6.3%                  |
| • 2 – 4                    | 40.0%              | 40.6%                 |
| • > 5                      | 5.9%               | 15.6%                 |

**Demographic data for patients with and without priority categorisation awaiting AF ablation.** A single patient was excluded from the AF symptoms pattern and duration category due to an incomplete entry.
